# Supplementary material for: Monte Carlo based QSGFEAR: prediction of Gibb's free energy of activation at different temperatures using SMILES based descriptors
Source: Royal Society of Chemistry journal article supplement (doi:10.1039/d2nj03515d), 2022-01-01
Supplement: d2nj03515d1.pdf [file d2nj03515d1.pdf]

## **Monte Carlo Based QSGFEAR: Prediction of Gibb's Free Energy of Activation at Different Temperatures Using SMILES Based Descriptors**

**Rahul Singh<sup>a</sup>, Parvin Kumar<sup>\*a</sup>, Meena Devi<sup>a</sup>, Sohan Lal<sup>a</sup>, Ashwani Kumar<sup>b</sup>, Jayant Sindhu<sup>c</sup>, Alla P. Toropova<sup>d</sup>, Andrey A. Toropov<sup>d</sup>, Devender Singh<sup>e</sup>**

<sup>a</sup>Department of Chemistry, Kurukshetra University, Kurukshetra-136119 (INDIA)

<sup>b</sup>Department of Pharmaceutical Sciences, GJUS&T, Hisar, INDIA -125001

<sup>c</sup>Department of Chemistry, COBS&H, CCS Haryana Agricultural University, Hisar, India-125004

<sup>d</sup>Department of Environmental Health Science, Istituto di Ricerche Farmacologiche Mario Negri IRCCS, Via Mario Negri 2, 20156 Milano, Italy

<sup>e</sup>Department of Chemistry, Maharshi Dayanand University, Rohtak, INDIA-124001

\*Corresponding Author: Email:- [parvinchem@kuk.ac.in](mailto:parvinchem@kuk.ac.in); [parvinjangra@gmail.com](mailto:parvinjangra@gmail.com)

**Table S1:** The Gibbs free energy of activation ( $\Delta G^\ddagger$ ) values of 2-aryliminothiazolidin-4-one derivatives at different temperatures.

| Compound | SMILES                                                                     | $\Delta G_{298}^\ddagger$ | $\Delta G_{318}^\ddagger$ | $\Delta G_{328}^\ddagger$ | $\Delta G_{338}^\ddagger$ | $\Delta G_{348}^\ddagger$ | $\Delta G_{358}^\ddagger$ | $\Delta G_{378}^\ddagger$ |
|----------|----------------------------------------------------------------------------|---------------------------|---------------------------|---------------------------|---------------------------|---------------------------|---------------------------|---------------------------|
| 1.       | <chem>COc1ccc(cc1)/N=C/I\SCC(=O)N1</chem>                                  | 14.72                     | 15.17                     | 15.36                     | 15.56                     | 15.7                      | 15.93                     | 16.34                     |
| 2.       | <chem>O=C1N/C(=N/c2ccccc2)/S/C/I=C\C=C\c1cccc1</chem>                      | 16.08                     | 16.41                     | 16.64                     | 16.71                     | 16.81                     | 16.98                     | 17.28                     |
| 3.       | <chem>Clc1ccc(cc1)/N=C\I/NC(=O)/C(=C/C=C/c2ccccc2)/S1</chem>               | 14.48                     | 14.94                     | 15.17                     | 15.43                     | 15.58                     | 15.75                     | 16.18                     |
| 4.       | <chem>Cc1ccc(cc1)/N=C\I/NC(=O)/C(=C/C=C/c2ccccc2)/S1</chem>                | 15.13                     | 15.39                     | 15.54                     | 15.7                      | 15.87                     | 15.92                     | 16.18                     |
| 5.       | <chem>COc1ccc(cc1)/N=C\I/NC(=O)/C(=C/C=C/c2ccccc2)/S1</chem>               | 16.08                     | 16.41                     | 16.64                     | 16.71                     | 16.81                     | 16.98                     | 17.28                     |
| 6.       | <chem>COc1ccc(cc1)/C=C/C=C/I\S/C(=N\c2ccccc2)/NC1=O</chem>                 | 15.67                     | 16.11                     | 16.33                     | 16.53                     | 16.72                     | 16.94                     | 17.33                     |
| 7.       | <chem>COc1ccc(cc1)/C=C/C=C/I\S/C(=N\c2ccc(cc2)Cl)/NC1=O</chem>             | 14.97                     | 15.34                     | 15.52                     | 15.69                     | 15.9                      | 16.07                     | 16.4                      |
| 8.       | <chem>COc1ccc(cc1)/C=C/C=C/I\S/C(=N\c2ccc(cc2)C)/NC1=O</chem>              | 14.97                     | 15.34                     | 15.52                     | 15.69                     | 15.87                     | 16.07                     | 16.4                      |
| 9.       | <chem>COc1ccc(cc1)/C=C/C=C/I\S/C(=N\c2ccc(cc2)OC)/NC1=O</chem>             | 14.07                     | 14.73                     |                           | 15.42                     |                           | 16.07                     | 16.72                     |
| 10.      | <chem>O=C1N/C(=N/c2ccccc2)/S/C/I=C\C=C\c1ccc(cc1)[N+](=O)[O-]</chem>       | 16.08                     | 16.25                     | 16.42                     | 16.5                      | 16.49                     | 16.56                     | 16.81                     |
| 11.      | <chem>Clc1ccc(cc1)/N=C\I/NC(=O)/C(=C/C=C/c2ccc(cc2)[N+](=O)[O-])/S1</chem> | 16.08                     | 16.25                     | 16.42                     | 16.5                      | 16.49                     | 16.56                     | 16.81                     |
| 12.      | <chem>Cc1ccc(cc1)/N=C\I/NC(=O)/C(=C/C=C/c2ccc(cc2)[N+](=O)[O-])/S1</chem>  | 13.8                      | 14.42                     | 14.73                     | 15.05                     | 15.35                     | 15.64                     | 16.24                     |
| 13.      | <chem>COc1ccc(cc1)/N=C/I\S/C(=C\C=C\c2ccc(cc2)[N+](=O)[O-])/C(=O)N1</chem> | 16.49                     | 16.76                     | 16.86                     | 17.05                     | 17.11                     | 17.19                     | 17.34                     |
| 14.      | <chem>CN(c1ccc(cc1)/C=C/C=C/I\S/C(=N\c2ccccc2)/NC1=O)C</chem>              | 15.67                     | 16.11                     | 16.33                     | 16.53                     | 16.72                     | 16.94                     | 17.33                     |

|            |                                                                     |       |       |       |       |       |       |       |
|------------|---------------------------------------------------------------------|-------|-------|-------|-------|-------|-------|-------|
| <b>15.</b> | <chem>Cle1ccc(cc1)/N=C\1/NC(=O)/C(=C/C=C/c2ccc(cc2)N(C)C)/S1</chem> | 16.08 | 16.18 | 16.19 | 16.31 | 16.33 | 16.33 | 16.43 |
| <b>16.</b> | <chem>Cc1ccc(cc1)/N=C\1/NC(=O)/C(=C/C=C/c2ccc(cc2)N(C)C)/S1</chem>  | 13.93 | 14.52 | 14.81 | 15.11 | 15.39 | 15.66 | 16.27 |
| <b>17.</b> | <chem>COc1ccc(cc1)/N=C\1/S/C(=C\C=C/c2ccc(cc2)N(C)C)/C(=O)N1</chem> | 14.17 | 14.73 | 14.96 | 15.23 | 15.52 | 15.79 | 16.29 |

**Table S2:** Split distribution with SMILES notation at different temperatures, experimental, calculated  $\Delta G^\ddagger$  values with applicability domain (AD) and DCW's using TF<sub>1</sub>

| TF1   |   |   |   |       |                                                                             |       |                              |                              |         |         |         |             |          |           |           |                      |     |     |     |
|-------|---|---|---|-------|-----------------------------------------------------------------------------|-------|------------------------------|------------------------------|---------|---------|---------|-------------|----------|-----------|-----------|----------------------|-----|-----|-----|
| Split |   |   |   | ID    | SMILES                                                                      | T (K) | $\Delta G^\ddagger_{(Expt)}$ | $\Delta G^\ddagger_{(Calc)}$ |         |         |         | DCWs(T*,N*) |          |           |           | Applicability Domain |     |     |     |
| 1     | 2 | 3 | 4 |       |                                                                             |       |                              | Split 1                      | Split 2 | Split 3 | Split 4 | DCW(1,8)    | DCW(2,5) | DCW(2,13) | DCW(1,23) | YES                  | YES | YES | NO  |
| V     | C | A | P | TH001 | <chem>COc1ccc(cc1)/N=C/1\SCC(=O)N1</chem>                                   | 298   | 14.72                        | 14.4568                      | 14.5604 | 14.9474 | 14.8297 | 34.34822    | 32.94961 | 52.06421  | 62.05937  | YES                  | YES | YES | NO  |
| C     | V | P | A | TH002 | <chem>O=C1N/C(=N/c2ccccc2)/S/C/1=C\C=C\c1ccccc1</chem>                      | 298   | 16.08                        | 15.749                       | 15.8295 | 16.0288 | 16.0033 | 37.41577    | 36.07755 | 55.6778   | 65.15171  | YES                  | YES | YES | YES |
| P     | A | C | V | TH003 | <chem>Clc1ccc(cc1)/N=C\1\NC(=O)/C(=C/C=C/c2ccccc2)/S1</chem>                | 298   | 14.48                        | 14.421                       | 14.5067 | 14.8196 | 14.719  | 34.26322    | 32.8172  | 51.63741  | 61.76762  | YES                  | YES | YES | YES |
| C     | V | P | A | TH004 | <chem>Cc1ccc(cc1)/N=C\1\NC(=O)/C(=C/C=C/c2ccccc2)/S1</chem>                 | 298   | 15.13                        | 14.3771                      | 14.4936 | 14.9993 | 14.9481 | 34.15912    | 32.78488 | 52.23776  | 62.37119  | YES                  | YES | YES | YES |
| V     | C | A | P | TH005 | <chem>COc1ccc(cc1)/N=C\1\NC(=O)/C(=C/C=C/c2ccccc2)/S1</chem>                | 298   | 16.08                        | 15.6256                      | 15.7162 | 16.018  | 16.0114 | 37.12271    | 35.79837 | 55.64198  | 65.17299  | YES                  | YES | YES | YES |
| C     | V | P | A | TH006 | <chem>COc1ccc(cc1)/C=C/C=C/1\S/C(=N\c2ccccc2)/NC1=O</chem>                  | 298   | 15.67                        | 15.5919                      | 15.6911 | 15.824  | 15.791  | 37.04282    | 35.73645 | 54.99361  | 64.59214  | YES                  | YES | YES | YES |
| C     | V | P | A | TH007 | <chem>COc1ccc(cc1)/C=C/C=C/1\S/C(=N\c2ccc(cc2)Cl)/NC1=O</chem>              | 298   | 14.97                        | 14.7747                      | 14.801  | 15.0252 | 14.9639 | 35.10303    | 33.54256 | 52.32433  | 62.4129   | YES                  | YES | YES | YES |
| V     | C | A | P | TH008 | <chem>COc1ccc(cc1)/C=C/C=C/1\S/C(=N\c2ccc(cc2)C)/NC1=O</chem>               | 298   | 14.97                        | 14.6444                      | 14.7229 | 14.9757 | 14.8741 | 34.79363    | 33.35015 | 52.15903  | 62.17637  | NO                   | YES | YES | YES |
| C     | V | P | A | TH009 | <chem>COc1ccc(cc1)/C=C/C=C/1\S/C(=N\c2ccc(cc2)OC)/NC1=O</chem>              | 298   | 14.07                        | 14.4635                      | 14.5495 | 14.759  | 14.6947 | 34.3642     | 32.92278 | 51.43486  | 61.70348  | YES                  | YES | YES | YES |
| A     | P | V | C | TH010 | <chem>O=C1N/C(=N/c2ccccc2)/S/C/1=C\C=C\c1ccc(cc1)[N+](=O)[O-]</chem>        | 298   | 16.08                        | 15.6876                      | 15.8048 | 15.6601 | 15.6248 | 37.27011    | 36.01668 | 54.44589  | 64.15424  | YES                  | YES | YES | YES |
| P     | A | C | V | TH011 | <chem>Clc1ccc(cc1)/N=C\1\NC(=O)/C(=C/C=C/c2ccc(cc2)[N+](=O)[O-])/S1~</chem> | 298   | 16.08                        | 15.6077                      | 15.6961 | 15.6557 | 15.6068 | 37.08043    | 35.74881 | 54.43126  | 64.10697  | YES                  | YES | YES | YES |
| A     | P | V | C | TH012 | <chem>Cc1ccc(cc1)/N=C\1\NC(=O)/C(=C/C=C/c2ccc(cc2)[N+](=O)[O-])/S1</chem>   | 298   | 13.8                         | 14.1977                      | 14.2311 | 14.3413 | 14.2481 | 33.73314    | 32.13796 | 50.03909  | 60.52683  | YES                  | YES | YES | YES |
| V     | C | A | P | TH013 | <chem>COc1ccc(cc1)/N=C/1\S/C(=C\C=C\c2ccc(cc2)[N+](=O)[O-])/C(=O)N1</chem>  | 298   | 16.49                        | 15.918                       | 15.9964 | 16.3261 | 16.3154 | 37.81701    | 36.48902 | 56.67144  | 65.97401  | YES                  | YES | YES | YES |
| V     | C | A | P | TH014 | <chem>CN(c1ccc(cc1)/C=C/C=C/1\S/C(=N\c2ccccc2)/NC1=O)C</chem>               | 298   | 15.67                        | 15.5663                      | 15.6426 | 15.9019 | 15.8531 | 36.98202    | 35.61706 | 55.25401  | 64.75572  | YES                  | YES | YES | YES |
| C     | V | P | A | TH015 | <chem>Clc1ccc(cc1)/N=C\1\NC(=O)/C(=C/C=C/c2ccc(cc2)N(C)C)/S1</chem>         | 298   | 16.08                        | 15.3999                      | 15.4356 | 15.5253 | 15.5041 | 36.58711    | 35.10685 | 53.99553  | 63.83627  | YES                  | YES | YES | YES |
| P     | A | C | V | TH016 | <chem>Cc1ccc(cc1)/N=C\1\NC(=O)/C(=C/C=C/c2ccc(cc2)N(C)C)/S1</chem>          | 298   | 13.93                        | 14.2033                      | 14.268  | 14.3317 | 14.2357 | 33.74666    | 32.22889 | 50.0069   | 60.49408  | YES                  | YES | YES | YES |
| V     | C | A | P | TH017 | <chem>COc1ccc(cc1)/N=C/1\S/C(=C\C=C\c2ccc(cc2)N(C)C)/C(=O)N1</chem>         | 298   | 14.17                        | 14.2871                      | 14.3309 | 14.1409 | 13.9696 | 33.94551    | 32.38401 | 49.36937  | 59.79302  | NO                   | YES | YES | YES |
| V     | C | A | P | TH018 | <chem>COc1ccc(cc1)/N=C/1\SCC(=O)N1</chem>                                   | 318   | 15.17                        | 14.9114                      | 15.03   | 15.341  | 15.2487 | 35.42755    | 34.10708 | 53.37946  | 63.16339  | YES                  | YES | YES | NO  |
| C     | V | P | A | TH019 | <chem>O=C1N/C(=N/c2ccccc2)/S/C/1=C\C=C\c1ccccc1</chem>                      | 318   | 16.41                        | 16.2037                      | 16.2991 | 16.4223 | 16.4223 | 38.49511    | 37.23502 | 56.99305  | 66.25573  | YES                  | YES | YES | YES |
| A     | P | V | C | TH020 | <chem>Clc1ccc(cc1)/N=C\1\NC(=O)/C(=C/C=C/c2ccccc2)/S1</chem>                | 318   | 14.94                        | 14.8756                      | 14.9763 | 15.2132 | 15.138  | 35.34256    | 33.97468 | 52.95266  | 62.87164  | YES                  | YES | YES | YES |
| C     | V | P | A | TH021 | <chem>Cc1ccc(cc1)/N=C\1\NC(=O)/C(=C/C=C/c2ccccc2)/S1</chem>                 | 318   | 15.39                        | 14.8318                      | 14.9632 | 15.3929 | 15.3671 | 35.23846    | 33.94235 | 53.553    | 63.4752   | YES                  | YES | YES | YES |
| V     | C | A | P | TH022 | <chem>COc1ccc(cc1)/N=C\1\NC(=O)/C(=C/C=C/c2ccccc2)/S1</chem>                | 318   | 16.41                        | 16.0802                      | 16.1858 | 16.4116 | 16.4304 | 38.20205    | 36.95584 | 56.95722  | 66.277    | YES                  | YES | YES | YES |
| V     | C | A | P | TH023 | <chem>COc1ccc(cc1)/C=C/C=C/1\S/C(=N\c2ccccc2)/NC1=O</chem>                  | 318   | 16.11                        | 16.0466                      | 16.1607 | 16.2176 | 16.21   | 38.12216    | 36.89393 | 56.30886  | 65.69616  | YES                  | YES | YES | YES |
| C     | V | P | A | TH024 | <chem>COc1ccc(cc1)/C=C/C=C/1\S/C(=N\c2ccc(cc2)Cl)/NC1=O</chem>              | 318   | 15.34                        | 15.2294                      | 15.2706 | 15.4188 | 15.3829 | 36.18237    | 34.70003 | 53.63958  | 63.51692  | YES                  | YES | YES | YES |
| V     | C | A | P | TH025 | <chem>COc1ccc(cc1)/C=C/C=C/1\S/C(=N\c2ccc(cc2)C)/NC1=O</chem>               | 318   | 15.34                        | 15.0991                      | 15.1925 | 15.3693 | 15.2931 | 35.87297    | 34.50762 | 53.47428  | 63.28039  | NO                   | YES | YES | YES |
| A     | P | V | C | TH026 | <chem>COc1ccc(cc1)/C=C/C=C/1\S/C(=N\c2ccc(cc2)OC)/NC1=O</chem>              | 318   | 14.73                        | 14.9182                      | 15.0191 | 15.1526 | 15.1137 | 35.44354    | 34.08025 | 52.75011  | 62.8075   | YES                  | YES | YES | YES |
| C     | V | P | A | TH027 | <chem>O=C1N/C(=N/c2ccccc2)/S/C/1=C\C=C\c1ccc(cc1)[N+](=O)[O-]</chem>        | 318   | 16.25                        | 16.1423                      | 16.2744 | 16.0537 | 16.0438 | 38.34945    | 37.17415 | 55.76113  | 65.25826  | YES                  | YES | YES | YES |
| V     | C | A | P | TH028 | <chem>Clc1ccc(cc1)/N=C\1\NC(=O)/C(=C/C=C/c2ccc(cc2)[N+](=O)[O-])/S1</chem>  | 318   | 16.25                        | 16.0624                      | 16.1657 | 16.0493 | 16.0258 | 38.15977    | 36.90628 | 55.7465   | 65.21099  | YES                  | YES | YES | YES |
| A     | P | V | C | TH029 | <chem>Cc1ccc(cc1)/N=C\1\NC(=O)/C(=C/C=C/c2ccc(cc2)[N+](=O)[O-])/S1</chem>   | 318   | 14.42                        | 14.6523                      | 14.7007 | 14.7349 | 14.6671 | 34.81248    | 33.29543 | 51.35434  | 61.63085  | YES                  | YES | YES | YES |
| V     | C | A | P | TH030 | <chem>COc1ccc(cc1)/N=C/1\S/C(=C\C=C\c2ccc(cc2)[N+](=O)[O-])/C(=O)N1</chem>  | 318   | 16.76                        | 16.3727                      | 16.466  | 16.7197 | 16.7344 | 38.89634    | 37.6465  | 57.98669  | 67.07803  | YES                  | YES | YES | YES |
| A     | P | V | C | TH031 | <chem>CN(c1ccc(cc1)/C=C/C=C/1\S/C(=N\c2ccccc2)/NC1=O)C</chem>               | 318   | 16.11                        | 16.021                       | 16.1123 | 16.2955 | 16.2721 | 38.06136    | 36.77453 | 56.56926  | 65.85974  | YES                  | YES | YES | YES |
| P     | A | C | V | TH032 | <chem>Clc1ccc(cc1)/N=C\1\NC(=O)/C(=C/C=C/c2ccc(cc2)N(C)C)/S1</chem>         | 318   | 16.18                        | 15.8546                      | 15.9052 | 15.9189 | 15.9231 | 37.66645    | 36.26432 | 55.31077  | 64.94029  | YES                  | YES | YES | YES |
| C     | V | P | A | TH033 | <chem>Cc1ccc(cc1)/N=C\1\NC(=O)/C(=C/C=C/c2ccc(cc2)N(C)C)/S1</chem>          | 318   | 14.52                        | 14.658                       | 14.7376 | 14.7253 | 14.6547 | 34.826      | 33.38636 | 51.32215  | 61.5981   | YES                  | YES | YES | YES |
| P     | A | C | V | TH034 | <chem>COc1ccc(cc1)/N=C/1\S/C(=C\C=C\c2ccc(cc2)N(C)C)/C(=O)N1</chem>         | 318   | 14.73                        | 14.7418                      | 14.8005 | 14.5345 | 14.3886 | 35.02485    | 33.54148 | 50.68462  | 60.89704  | NO                   | YES | YES | YES |
| P     | A | C | V | TH035 | <chem>COc1ccc(cc1)/N=C/1\SCC(=O)N1</chem>                                   | 328   | 15.36                        | 15.2812                      | 15.3902 | 15.4626 | 15.3679 | 36.30532    | 34.99492 | 53.78607  | 63.47735  | YES                  | YES | YES | NO  |
| A     | P | V | C | TH036 | <chem>O=C1N/C(=N/c2ccccc2)/S/C/1=C\C=C\c1ccccc1</chem>                      | 328   | 16.64                        | 16.5735                      | 16.6593 | 16.544  | 16.5415 | 39.37287    | 38.12286 | 57.39966  | 66.5697   | YES                  | YES | YES | YES |
| A     | P | V | C | TH037 | <chem>Clc1ccc(cc1)/N=C\1\NC(=O)/C(=C/C=C/c2ccccc2)/S1</chem>                | 328   | 15.17                        | 15.2454                      | 15.3365 | 15.3349 | 15.2572 | 36.22032    | 34.86252 | 53.35928  | 63.1856   | YES                  | YES | YES | YES |

|   |   |   |   |       |                                                                |     |       |         |         |         |         |          |          |          |          |     |     |     |     |
|---|---|---|---|-------|----------------------------------------------------------------|-----|-------|---------|---------|---------|---------|----------|----------|----------|----------|-----|-----|-----|-----|
| P | A | C | V | TH038 | Cc1ccc(cc1)/N=C\1/NC(=O)/C(=C/C=C/c2ccccc2)/S1                 | 328 | 15.54 | 15.2016 | 15.3234 | 15.5146 | 15.4862 | 36.11622 | 34.83019 | 53.95962 | 63.78917 | YES | YES | YES | YES |
| P | A | C | V | TH039 | COc1ccc(cc1)/N=C\1/NC(=O)/C(=C/C=C/c2ccccc2)/S1                | 328 | 16.64 | 16.45   | 16.546  | 16.5333 | 16.5496 | 39.07982 | 37.84368 | 57.36384 | 66.59097 | YES | YES | YES | YES |
| V | C | A | P | TH040 | COc1ccc(cc1)/C=C/C=C/1\S/C(=N\c2ccccc2)/NC1=O                  | 328 | 16.33 | 16.4164 | 16.5209 | 16.3393 | 16.3291 | 38.99993 | 37.78177 | 56.71547 | 66.01012 | YES | YES | YES | YES |
| C | V | P | A | TH041 | COc1ccc(cc1)/C=C/C=C/1\S/C(=N\c2ccc(cc2)Cl)/NC1=O              | 328 | 15.52 | 15.5992 | 15.6308 | 15.5405 | 15.5021 | 37.06014 | 35.58787 | 54.0462  | 63.83089 | YES | YES | YES | YES |
| V | C | A | P | TH042 | COc1ccc(cc1)/C=C/C=C/1\S/C(=N\c2ccc(cc2)C)/NC1=O               | 328 | 15.52 | 15.4689 | 15.5527 | 15.491  | 15.4123 | 36.75074 | 35.39546 | 53.8809  | 63.59436 | NO  | YES | YES | YES |
| A | P | V | C | TH044 | O=C1N/C(=N/c2ccccc2)/S/C/1=C\C=C\c1ccc(cc1)[N+](=O)[O-]        | 328 | 16.42 | 16.5121 | 16.6346 | 16.1754 | 16.1629 | 39.22721 | 38.062   | 56.16775 | 65.57222 | YES | YES | YES | YES |
| P | A | C | V | TH045 | Clc1ccc(cc1)/N=C\1/NC(=O)/C(=C/C=C/c2ccc(cc2)[N+](=O)[O-])/S1~ | 328 | 16.42 | 16.4322 | 16.5259 | 16.171  | 16.145  | 39.03753 | 37.79412 | 56.15312 | 65.52496 | YES | YES | YES | YES |
| C | V | P | A | TH046 | Cc1ccc(cc1)/N=C\1/NC(=O)/C(=C/C=C/c2ccc(cc2)[N+](=O)[O-])/S1   | 328 | 14.73 | 15.0221 | 15.0609 | 14.8566 | 14.7863 | 35.69024 | 34.18327 | 51.76096 | 61.94481 | YES | YES | YES | YES |
| A | P | V | C | TH047 | COc1ccc(cc1)/N=C/1\S/C(=C\C=C\c2ccc(cc2)[N+](=O)[O-])/C(=O)N1~ | 328 | 16.86 | 16.7425 | 16.8263 | 16.8414 | 16.8536 | 39.77411 | 38.53434 | 58.39331 | 67.39199 | YES | YES | YES | YES |
| A | P | V | C | TH048 | CN(c1ccc(cc1)/C=C/C=C/1\S/C(=N\c2ccccc2)/NC1=O)C               | 328 | 16.33 | 16.3907 | 16.4725 | 16.4172 | 16.3912 | 38.93913 | 37.66237 | 56.97588 | 66.17371 | YES | YES | YES | YES |
| A | P | V | C | TH049 | Clc1ccc(cc1)/N=C\1/NC(=O)/C(=C/C=C/c2ccc(cc2)N(C)C)/S1         | 328 | 16.19 | 16.2244 | 16.2655 | 16.0406 | 16.0423 | 38.54421 | 37.15216 | 55.71739 | 65.25425 | YES | YES | YES | YES |
| V | C | A | P | TH050 | Cc1ccc(cc1)/N=C\1/NC(=O)/C(=C/C=C/c2ccc(cc2)N(C)C)/S1          | 328 | 14.81 | 15.0278 | 15.0978 | 14.847  | 14.7738 | 35.70376 | 34.2742  | 51.72876 | 61.91207 | YES | YES | YES | YES |
| P | A | C | V | TH051 | COc1ccc(cc1)/N=C/1\S/C(=C\C=C\c2ccc(cc2)N(C)C)/C(=O)N1         | 328 | 14.96 | 15.1116 | 15.1607 | 14.6562 | 14.5078 | 35.90261 | 34.42932 | 51.09124 | 61.211   | NO  | YES | YES | YES |
| C | V | P | A | TH052 | COc1ccc(cc1)/N=C/1\SCC(=O)N1                                   | 338 | 15.56 | 15.3481 | 15.4806 | 15.7116 | 15.6209 | 36.464   | 35.21763 | 54.61787 | 64.14394 | YES | YES | YES | NO  |
| C | V | P | A | TH053 | O=C1N/C(=N/c2ccccc2)/S/C/1=C\C=C\c1ccccc1                      | 338 | 16.71 | 16.6403 | 16.7497 | 16.793  | 16.7945 | 39.53155 | 38.34557 | 58.23147 | 67.23628 | YES | YES | YES | YES |
| P | A | C | V | TH054 | Clc1ccc(cc1)/N=C\1/NC(=O)/C(=C/C=C/c2ccccc2)/S1                | 338 | 15.43 | 15.3123 | 15.4269 | 15.5838 | 15.5101 | 36.379   | 35.08523 | 54.19108 | 63.85219 | YES | YES | YES | YES |
| C | V | P | A | TH055 | Cc1ccc(cc1)/N=C\1/NC(=O)/C(=C/C=C/c2ccccc2)/S1                 | 338 | 15.7  | 15.2684 | 15.4137 | 15.7635 | 15.7392 | 36.2749  | 35.0529  | 54.79142 | 64.45576 | YES | YES | YES | YES |
| V | C | A | P | TH056 | COc1ccc(cc1)/N=C\1/NC(=O)/C(=C/C=C/c2ccccc2)/S1                | 338 | 16.71 | 16.5169 | 16.6364 | 16.7822 | 16.8026 | 39.2385  | 38.06639 | 58.19564 | 67.25756 | YES | YES | YES | YES |
| A | P | V | C | TH057 | COc1ccc(cc1)/C=C/C=C/1\S/C(=N\c2ccccc2)/NC1=O                  | 338 | 16.53 | 16.4832 | 16.6113 | 16.5882 | 16.5821 | 39.15861 | 38.00448 | 57.54728 | 66.67671 | YES | YES | YES | YES |
| A | P | V | C | TH058 | COc1ccc(cc1)/C=C/C=C/1\S/C(=N\c2ccc(cc2)Cl)/NC1=O              | 338 | 15.69 | 15.666  | 15.7212 | 15.7894 | 15.755  | 37.21882 | 35.81058 | 54.878   | 64.49747 | YES | YES | YES | YES |
| P | A | C | V | TH059 | COc1ccc(cc1)/C=C/C=C/1\S/C(=N\c2ccc(cc2)C)/NC1=O               | 338 | 15.69 | 15.5357 | 15.6431 | 15.7399 | 15.6653 | 36.90942 | 35.61817 | 54.7127  | 64.26095 | NO  | YES | YES | YES |
| A | P | V | C | TH060 | COc1ccc(cc1)/C=C/C=C/1\S/C(=N\c2ccc(cc2)OC)/NC1=O              | 338 | 15.42 | 15.3548 | 15.4697 | 15.5232 | 15.4858 | 36.47999 | 35.1908  | 53.98853 | 63.78805 | YES | YES | YES | YES |
| C | V | P | A | TH061 | O=C1N/C(=N/c2ccccc2)/S/C/1=C\C=C\c1ccc(cc1)[N+](=O)[O-]        | 338 | 16.5  | 16.5789 | 16.725  | 16.4243 | 16.4159 | 39.38589 | 38.28471 | 56.99955 | 66.23881 | YES | YES | YES | YES |
| V | C | A | P | TH062 | Clc1ccc(cc1)/N=C\1/NC(=O)/C(=C/C=C/c2ccc(cc2)[N+](=O)[O-])/S1  | 338 | 16.5  | 16.499  | 16.6163 | 16.4199 | 16.398  | 39.19621 | 38.01683 | 56.98492 | 66.19154 | YES | YES | YES | YES |
| A | P | V | C | TH063 | Cc1ccc(cc1)/N=C\1/NC(=O)/C(=C/C=C/c2ccc(cc2)[N+](=O)[O-])/S1   | 338 | 15.05 | 15.089  | 15.1513 | 15.1055 | 15.0392 | 35.84892 | 34.40598 | 52.59276 | 62.6114  | YES | YES | YES | YES |
| P | A | C | V | TH064 | COc1ccc(cc1)/N=C/1\S/C(=C\C=C\c2ccc(cc2)[N+](=O)[O-])/C(=O)N1~ | 338 | 17.05 | 16.8093 | 16.9166 | 17.0903 | 17.1066 | 39.93279 | 38.75705 | 59.22511 | 68.05858 | YES | YES | YES | YES |
| P | A | C | V | TH065 | CN(c1ccc(cc1)/C=C/C=C/1\S/C(=N\c2ccccc2)/NC1=O)C               | 338 | 16.53 | 16.4576 | 16.5628 | 16.6661 | 16.6442 | 39.09781 | 37.88508 | 57.80768 | 66.84029 | YES | YES | YES | YES |
| C | V | P | A | TH066 | Clc1ccc(cc1)/N=C\1/NC(=O)/C(=C/C=C/c2ccc(cc2)N(C)C)/S1         | 338 | 16.31 | 16.2912 | 16.3558 | 16.2895 | 16.2953 | 38.70289 | 37.37487 | 56.54919 | 65.92084 | YES | YES | YES | YES |
| P | A | C | V | TH067 | Cc1ccc(cc1)/N=C\1/NC(=O)/C(=C/C=C/c2ccc(cc2)N(C)C)/S1          | 338 | 15.11 | 15.0946 | 15.1882 | 15.0959 | 15.0268 | 35.86244 | 34.49691 | 52.56057 | 62.57865 | YES | YES | YES | YES |
| P | A | C | V | TH068 | COc1ccc(cc1)/N=C/1\S/C(=C\C=C\c2ccc(cc2)N(C)C)/C(=O)N1         | 338 | 15.23 | 15.1784 | 15.2511 | 14.9051 | 14.7607 | 36.06129 | 34.65203 | 51.92304 | 61.87759 | NO  | YES | YES | YES |
| V | C | A | P | TH069 | COc1ccc(cc1)/N=C/1\SCC(=O)N1                                   | 348 | 15.7  | 15.4648 | 15.6167 | 15.7977 | 15.7485 | 36.74113 | 35.55317 | 54.90583 | 64.48014 | YES | YES | YES | NO  |
| A | P | V | C | TH070 | O=C1N/C(=N/c2ccccc2)/S/C/1=C\C=C\c1ccccc1                      | 348 | 16.81 | 16.7571 | 16.8858 | 16.8791 | 16.9221 | 39.80868 | 38.68111 | 58.51942 | 67.57249 | YES | YES | YES | YES |
| V | C | A | P | TH071 | Clc1ccc(cc1)/N=C\1/NC(=O)/C(=C/C=C/c2ccccc2)/S1                | 348 | 15.58 | 15.429  | 15.563  | 15.67   | 15.6377 | 36.65613 | 35.42076 | 54.47903 | 64.18839 | YES | YES | YES | YES |
| C | V | P | A | TH072 | Cc1ccc(cc1)/N=C\1/NC(=O)/C(=C/C=C/c2ccccc2)/S1                 | 348 | 15.87 | 15.3851 | 15.5499 | 15.8497 | 15.8668 | 36.55203 | 35.38844 | 55.07937 | 64.79196 | YES | YES | YES | YES |
| P | A | C | V | TH073 | COc1ccc(cc1)/N=C\1/NC(=O)/C(=C/C=C/c2ccccc2)/S1                | 348 | 16.81 | 16.6336 | 16.7725 | 16.8684 | 16.9302 | 39.51562 | 38.40193 | 58.48359 | 67.59376 | YES | YES | YES | YES |
| A | P | V | C | TH074 | COc1ccc(cc1)/C=C/C=C/1\S/C(=N\c2ccccc2)/NC1=O                  | 348 | 16.72 | 16.5999 | 16.7474 | 16.6744 | 16.7097 | 39.43574 | 38.34001 | 57.83523 | 67.01292 | YES | YES | YES | YES |
| A | P | V | C | TH075 | COc1ccc(cc1)/C=C/C=C/1\S/C(=N\c2ccc(cc2)Cl)/NC1=O              | 348 | 15.9  | 15.7828 | 15.8573 | 15.8756 | 15.8826 | 37.49595 | 36.14611 | 55.16595 | 64.83368 | YES | YES | YES | YES |
| V | C | A | P | TH076 | COc1ccc(cc1)/C=C/C=C/1\S/C(=N\c2ccc(cc2)C)/NC1=O               | 348 | 15.87 | 15.6524 | 15.7792 | 15.8261 | 15.7929 | 37.18654 | 35.95371 | 55.00065 | 64.59715 | NO  | YES | YES | YES |
| A | P | V | C | TH078 | O=C1N/C(=N/c2ccccc2)/S/C/1=C\C=C\c1ccc(cc1)[N+](=O)[O-]        | 348 | 16.49 | 16.6957 | 16.8611 | 16.5105 | 16.5435 | 39.66302 | 38.62024 | 57.2875  | 66.57501 | YES | YES | YES | YES |
| P | A | C | V | TH079 | Clc1ccc(cc1)/N=C\1/NC(=O)/C(=C/C=C/c2ccc(cc2)[N+](=O)[O-])/S1~ | 348 | 16.49 | 16.6158 | 16.7524 | 16.5061 | 16.5256 | 39.47334 | 38.35236 | 57.27287 | 66.52775 | YES | YES | YES | YES |
| A | P | V | C | TH080 | Cc1ccc(cc1)/N=C\1/NC(=O)/C(=C/C=C/c2ccc(cc2)[N+](=O)[O-])/S1   | 348 | 15.35 | 15.2057 | 15.2874 | 15.1917 | 15.1668 | 36.12605 | 34.74152 | 52.88071 | 62.9476  | YES | YES | YES | YES |

|   |   |   |   |       |                                                                |     |       |         |         |         |         |          |          |          |          |     |     |     |     |
|---|---|---|---|-------|----------------------------------------------------------------|-----|-------|---------|---------|---------|---------|----------|----------|----------|----------|-----|-----|-----|-----|
| C | V | P | A | TH081 | COc1ccc(cc1)/N=C/1\S/C(=C\C=C\c2ccc(cc2)[N+](=O)[O-])/C(=O)N1~ | 348 | 17.11 | 16.9261 | 17.0527 | 17.1765 | 17.2342 | 40.20992 | 39.09258 | 59.51306 | 68.39479 | YES | YES | YES | YES |
| P | A | C | V | TH082 | CN(c1ccc(cc1)/C=C/C=C/1\S/C(=N\c2ccccc2)/NC1=O)C               | 348 | 16.72 | 16.5743 | 16.699  | 16.7523 | 16.7718 | 39.37494 | 38.22062 | 58.09563 | 67.1765  | YES | YES | YES | YES |
| P | A | C | V | TH083 | Clc1ccc(cc1)/N=C\1\NC(=O)/C(=C/C=C/c2ccc(cc2)N(C)C)/S1         | 348 | 16.33 | 16.408  | 16.492  | 16.3757 | 16.4228 | 38.98002 | 37.71041 | 56.83715 | 66.25704 | YES | YES | YES | YES |
| V | C | A | P | TH084 | Cc1ccc(cc1)/N=C\1\NC(=O)/C(=C/C=C/c2ccc(cc2)N(C)C)/S1          | 348 | 15.39 | 15.2114 | 15.3243 | 15.1821 | 15.1544 | 36.13957 | 34.83245 | 52.84852 | 62.91486 | YES | YES | YES | YES |
| A | P | V | C | TH085 | COc1ccc(cc1)/N=C/1\S/C(=C\C=C\c2ccc(cc2)N(C)C)/C(=O)N1         | 348 | 15.52 | 15.2952 | 15.3872 | 14.9913 | 14.8883 | 36.33842 | 34.98757 | 52.21099 | 62.21379 | NO  | YES | YES | YES |
| C | V | P | A | TH086 | COc1ccc(cc1)/N=C/1\SCC(=O)N1                                   | 358 | 15.93 | 15.8534 | 15.9672 | 15.8648 | 15.8391 | 37.66347 | 36.41708 | 55.13006 | 64.7189  | YES | YES | YES | NO  |
| V | C | A | P | TH087 | O=C1N/C(=N/c2ccccc2)/S/C/1=C\C=C\c1ccccc1                      | 358 | 16.98 | 17.1456 | 17.2363 | 16.9462 | 17.0127 | 40.73102 | 39.54502 | 58.74365 | 67.81124 | YES | YES | YES | YES |
| A | P | V | C | TH088 | Clc1ccc(cc1)/N=C\1\NC(=O)/C(=C/C=C/c2ccccc2)/S1                | 358 | 15.75 | 15.8175 | 15.9135 | 15.7371 | 15.7284 | 37.57847 | 36.28468 | 54.70327 | 64.42715 | YES | YES | YES | YES |
| P | A | C | V | TH089 | Cc1ccc(cc1)/N=C\1\NC(=O)/C(=C/C=C/c2ccccc2)/S1                 | 358 | 15.92 | 15.7737 | 15.9004 | 15.9168 | 15.9574 | 37.47437 | 36.25235 | 55.30361 | 65.03072 | YES | YES | YES | YES |
| A | P | V | C | TH090 | COc1ccc(cc1)/N=C\1\NC(=O)/C(=C/C=C/c2ccccc2)/S1                | 358 | 16.98 | 17.0221 | 17.123  | 16.9355 | 17.0208 | 40.43796 | 39.26584 | 58.70783 | 67.83252 | YES | YES | YES | YES |
| P | A | C | V | TH091 | COc1ccc(cc1)/C=C/C=C/1\S/C(=N\c2ccccc2)/NC1=O                  | 358 | 16.94 | 16.9885 | 17.0979 | 16.7415 | 16.8003 | 40.35808 | 39.20393 | 58.05946 | 67.25167 | YES | YES | YES | YES |
| V | C | A | P | TH092 | COc1ccc(cc1)/C=C/C=C/1\S/C(=N\c2ccc(cc2)Cl)/NC1=O              | 358 | 16.07 | 16.1713 | 16.2078 | 15.9427 | 15.9733 | 38.41829 | 37.01003 | 55.39019 | 65.07244 | YES | YES | YES | YES |
| A | P | V | C | TH093 | COc1ccc(cc1)/C=C/C=C/1\S/C(=N\c2ccc(cc2)C)/NC1=O               | 358 | 16.07 | 16.041  | 16.1297 | 15.8932 | 15.8835 | 38.10888 | 36.81762 | 55.22489 | 64.83591 | NO  | YES | YES | YES |
| P | A | C | V | TH094 | COc1ccc(cc1)/C=C/C=C/1\S/C(=N\c2ccc(cc2)OC)/NC1=O              | 358 | 16.07 | 15.8601 | 15.9563 | 15.6765 | 15.704  | 37.67946 | 36.39025 | 54.50071 | 64.36301 | YES | YES | YES | YES |
| C | V | P | A | TH095 | O=C1N/C(=N/c2ccccc2)/S/C/1=C\C=C\c1ccc(cc1)[N+](=O)[O-]        | 358 | 16.56 | 17.0842 | 17.2116 | 16.5776 | 16.6341 | 40.58536 | 39.48416 | 57.51174 | 66.81377 | YES | YES | YES | YES |
| V | C | A | P | TH096 | Clc1ccc(cc1)/N=C\1\NC(=O)/C(=C/C=C/c2ccc(cc2)[N+](=O)[O-])/S1  | 358 | 16.56 | 17.0043 | 17.1029 | 16.5732 | 16.6162 | 40.39568 | 39.21628 | 57.49711 | 66.7665  | YES | YES | YES | YES |
| A | P | V | C | TH097 | Cc1ccc(cc1)/N=C\1\NC(=O)/C(=C/C=C/c2ccc(cc2)[N+](=O)[O-])/S1   | 358 | 15.64 | 15.5942 | 15.6379 | 15.2588 | 15.2574 | 37.04839 | 35.60543 | 53.10494 | 63.18636 | YES | YES | YES | YES |
| V | C | A | P | TH098 | COc1ccc(cc1)/N=C/1\S/C(=C\C=C\c2ccc(cc2)[N+](=O)[O-])/C(=O)N1  | 358 | 17.19 | 17.3146 | 17.4033 | 17.2436 | 17.3248 | 41.13226 | 39.9565  | 59.7373  | 68.63354 | YES | YES | YES | YES |
| C | V | P | A | TH099 | CN(c1ccc(cc1)/C=C/C=C/1\S/C(=N\c2ccccc2)/NC1=O)C               | 358 | 16.94 | 16.9629 | 17.0495 | 16.8194 | 16.8624 | 40.29728 | 39.08453 | 58.31987 | 67.41526 | YES | YES | YES | YES |
| C | V | P | A | TH100 | Clc1ccc(cc1)/N=C\1\NC(=O)/C(=C/C=C/c2ccc(cc2)N(C)C)/S1         | 358 | 16.33 | 16.7965 | 16.8425 | 16.4428 | 16.5135 | 39.90236 | 38.57432 | 57.06138 | 66.4958  | YES | YES | YES | YES |
| P | A | C | V | TH101 | Cc1ccc(cc1)/N=C\1\NC(=O)/C(=C/C=C/c2ccc(cc2)N(C)C)/S1          | 358 | 15.66 | 15.5999 | 15.6748 | 15.2492 | 15.245  | 37.06191 | 35.69636 | 53.07275 | 63.15361 | YES | YES | YES | YES |
| P | A | C | V | TH102 | COc1ccc(cc1)/N=C/1\S/C(=C\C=C\c2ccc(cc2)N(C)C)/C(=O)N1         | 358 | 15.79 | 15.6837 | 15.7378 | 15.0584 | 14.9789 | 37.26076 | 35.85148 | 52.43522 | 62.45255 | NO  | YES | YES | YES |
| V | C | A | P | TH103 | COc1ccc(cc1)/N=C/1\SCC(=O)N1                                   | 378 | 16.34 | 15.1064 | 15.297  | 15.8912 | 15.9238 | 35.89033 | 34.76503 | 55.21803 | 64.94223 | YES | YES | YES | NO  |
| A | P | V | C | TH104 | O=C1N/C(=N/c2ccccc2)/S/C/1=C\C=C\c1ccccc1                      | 378 | 17.28 | 17.4514 | 17.6055 | 17.3895 | 17.3906 | 41.45699 | 40.45506 | 60.2249  | 68.80701 | YES | YES | YES | YES |
| C | V | P | A | TH105 | Clc1ccc(cc1)/N=C\1\NC(=O)/C(=C/C=C/c2ccccc2)/S1                | 378 | 16.18 | 16.1234 | 16.2827 | 16.1804 | 16.1063 | 38.30444 | 37.19472 | 56.18451 | 65.42292 | YES | YES | YES | YES |
| V | C | A | P | TH106 | Cc1ccc(cc1)/N=C\1\NC(=O)/C(=C/C=C/c2ccccc2)/S1                 | 378 | 16.18 | 16.0795 | 16.2696 | 16.36   | 16.3353 | 38.20034 | 37.16239 | 56.78485 | 66.02649 | YES | YES | YES | YES |
| P | A | C | V | TH107 | COc1ccc(cc1)/N=C\1\NC(=O)/C(=C/C=C/c2ccccc2)/S1                | 378 | 17.28 | 17.328  | 17.4923 | 17.3788 | 17.3987 | 41.16393 | 40.17588 | 60.18907 | 68.82829 | YES | YES | YES | YES |
| C | V | P | A | TH108 | COc1ccc(cc1)/C=C/C=C/1\S/C(=N\c2ccccc2)/NC1=O                  | 378 | 17.33 | 17.2943 | 17.4671 | 17.1848 | 17.1783 | 41.08404 | 40.11397 | 59.54071 | 68.24744 | YES | YES | YES | YES |
| A | P | V | C | TH109 | COc1ccc(cc1)/C=C/C=C/1\S/C(=N\c2ccc(cc2)Cl)/NC1=O              | 378 | 16.4  | 16.4772 | 16.577  | 16.386  | 16.3512 | 39.14425 | 37.92007 | 56.87143 | 66.06821 | YES | YES | YES | YES |
| P | A | C | V | TH110 | COc1ccc(cc1)/C=C/C=C/1\S/C(=N\c2ccc(cc2)C)/NC1=O               | 378 | 16.4  | 16.3468 | 16.499  | 16.3365 | 16.2614 | 38.83485 | 37.72766 | 56.70613 | 65.83168 | NO  | YES | YES | YES |
| C | V | P | A | TH111 | COc1ccc(cc1)/C=C/C=C/1\S/C(=N\c2ccc(cc2)OC)/NC1=O              | 378 | 16.72 | 16.1659 | 16.3256 | 16.1198 | 16.0819 | 38.40542 | 37.30029 | 55.98196 | 65.35878 | YES | YES | YES | YES |
| C | V | P | A | TH112 | O=C1N/C(=N/c2ccccc2)/S/C/1=C\C=C\c1ccc(cc1)[N+](=O)[O-]        | 378 | 16.81 | 17.3901 | 17.5808 | 17.0208 | 17.0121 | 41.31133 | 40.3942  | 58.99298 | 67.80954 | YES | YES | YES | YES |
| V | C | A | P | TH113 | Clc1ccc(cc1)/N=C\1\NC(=O)/C(=C/C=C/c2ccc(cc2)[N+](=O)[O-])/S1  | 378 | 16.81 | 17.3102 | 17.4722 | 17.0165 | 16.9941 | 41.12165 | 40.12632 | 58.97835 | 67.76227 | YES | YES | YES | YES |
| P | A | C | V | TH114 | Cc1ccc(cc1)/N=C\1\NC(=O)/C(=C/C=C/c2ccc(cc2)[N+](=O)[O-])/S1   | 378 | 16.24 | 15.9001 | 16.0071 | 15.7021 | 15.6354 | 37.77436 | 36.51547 | 54.58619 | 64.18213 | YES | YES | YES | YES |
| A | P | V | C | TH115 | COc1ccc(cc1)/N=C/1\S/C(=C\C=C\c2ccc(cc2)[N+](=O)[O-])/C(=O)N1~ | 378 | 17.34 | 17.6204 | 17.7725 | 17.6869 | 17.7027 | 41.85823 | 40.86654 | 61.21854 | 69.62931 | YES | YES | YES | YES |
| V | C | A | P | TH116 | CN(c1ccc(cc1)/C=C/C=C/1\S/C(=N\c2ccccc2)/NC1=O)C               | 378 | 17.33 | 17.2687 | 17.4187 | 17.2627 | 17.2403 | 41.02324 | 39.99457 | 59.80111 | 68.41103 | YES | YES | YES | YES |
| C | V | P | A | TH117 | Clc1ccc(cc1)/N=C\1\NC(=O)/C(=C/C=C/c2ccc(cc2)N(C)C)/S1         | 378 | 16.43 | 17.1023 | 17.2117 | 16.8861 | 16.8914 | 40.62833 | 39.48436 | 58.54262 | 67.49157 | YES | YES | YES | YES |
| A | P | V | C | TH118 | Cc1ccc(cc1)/N=C\1\NC(=O)/C(=C/C=C/c2ccc(cc2)N(C)C)/S1          | 378 | 16.27 | 15.9058 | 16.044  | 15.6924 | 15.6229 | 37.78788 | 36.6064  | 54.554   | 64.14938 | YES | YES | YES | YES |
| P | A | C | V | TH119 | COc1ccc(cc1)/N=C/1\S/C(=C\C=C\c2ccc(cc2)N(C)C)/C(=O)N1         | 378 | 16.29 | 15.9895 | 16.107  | 15.5017 | 15.3569 | 37.98673 | 36.76152 | 53.91647 | 63.44832 | NO  | YES | YES | YES |

A = Active training set, P = Passive training set, C = Calibration set, V = Validation set

**Table S3:** Split distribution with SMILES notation at different temperatures, experimental, calculated  $\Delta G^\ddagger$  values with applicability domain (AD) and DCWs using TF<sub>2</sub>

|       |   |   |   | TF <sub>2</sub> |                                                                             |       |                             |         |         |         |             |           |          |           |                      |     |     |     |           |
|-------|---|---|---|-----------------|-----------------------------------------------------------------------------|-------|-----------------------------|---------|---------|---------|-------------|-----------|----------|-----------|----------------------|-----|-----|-----|-----------|
| Split |   |   |   | ID              | SMILES                                                                      | T (K) | $\Delta G^\ddagger_{(Exp)}$ |         |         |         | DCWs(T*,N*) |           |          |           | Applicability Domain |     |     |     |           |
| 1     | 2 | 3 | 4 |                 |                                                                             |       | $\Delta G^\ddagger_{(Exp)}$ | Split 1 | Split 2 | Split 3 | Split 4     | DCW(3,14) | DCW(2,9) | DCW(2,20) |                      |     |     |     | DCW(1,18) |
| V     | C | A | P | TH001           | <chem>COc1ccc(cc1)/N=C/1\SCC(=O)N1</chem>                                   | 298   | 14.72                       | 14.4835 | 14.7899 | 14.9168 | 14.9215     | 56.27885  | 57.3131  | 47.11404  | 49.29291             | YES | YES | YES | NO        |
| C     | V | P | A | TH002           | <chem>O=C1N/C(=N/c2ccccc2)/S/C/1=C\C=C\Cc1ccccc1</chem>                     | 298   | 16.08                       | 15.7902 | 15.9483 | 15.989  | 16.0307     | 59.5549   | 61.08181 | 49.88841  | 52.20742             | YES | YES | YES | YES       |
| P     | A | C | V | TH003           | <chem>Clc1ccc(cc1)/N=C\1\NC(=O)/C(=C/C=C/c2ccccc2)/S1</chem>                | 298   | 14.48                       | 14.4582 | 14.5334 | 14.759  | 14.7025     | 56.21557  | 56.47841 | 46.70579  | 48.71742             | YES | YES | YES | YES       |
| C     | V | P | A | TH004           | <chem>Cc1ccc(cc1)/N=C\1\NC(=O)/C(=C/C=C/c2ccccc2)/S1</chem>                 | 298   | 15.13                       | 14.5435 | 14.5759 | 14.8938 | 14.9627     | 56.42942  | 56.61677 | 47.05463  | 49.4013              | YES | YES | YES | YES       |
| V     | C | A | P | TH005           | <chem>COc1ccc(cc1)/N=C\1\NC(=O)/C(=C/C=C/c2ccccc2)/S1</chem>                | 298   | 16.08                       | 15.6035 | 15.8116 | 15.9794 | 15.9887     | 59.08673  | 60.63714 | 49.86354  | 52.09711             | YES | YES | YES | YES       |
| C     | V | P | A | TH006           | <chem>COc1ccc(cc1)/C=C/C=C/1\S/C(=N\c2ccccc2)/NC1=O</chem>                  | 298   | 15.67                       | 15.5804 | 15.7528 | 15.8311 | 15.8295     | 59.02877  | 60.44582 | 49.47978  | 51.6786              | YES | YES | YES | YES       |
| C     | V | P | A | TH007           | <chem>COc1ccc(cc1)/C=C/C=C/1\S/C(=N\c2ccc(cc2)Cl)/NC1=O</chem>              | 298   | 14.97                       | 14.7563 | 14.8561 | 14.9623 | 14.9642     | 56.96277  | 57.52834 | 47.23186  | 49.40521             | YES | YES | YES | YES       |
| V     | C | A | P | TH008           | <chem>COc1ccc(cc1)/C=C/C=C/1\S/C(=N\c2ccc(cc2)C)/NC1=O</chem>               | 298   | 14.97                       | 14.6293 | 14.6945 | 14.9529 | 14.9386     | 56.64435  | 57.00274 | 47.20747  | 49.33781             | YES | YES | YES | YES       |
| C     | V | P | A | TH009           | <chem>COc1ccc(cc1)/C=C/C=C/1\S/C(=N\c2ccc(cc2)OC)/NC1=O</chem>              | 298   | 14.07                       | 14.5141 | 14.575  | 14.7401 | 14.6149     | 56.35552  | 56.61393 | 46.65689  | 48.48744             | YES | YES | YES | YES       |
| A     | P | V | C | TH010           | <chem>O=C1N/C(=N/c2ccccc2)/S/C/1=C\C=C\Cc1ccc(cc1)[N+](=O)[O-]</chem>       | 298   | 16.08                       | 15.6782 | 15.8735 | 15.6023 | 15.6868     | 59.27403  | 60.83871 | 48.88778  | 51.3039              | YES | YES | YES | YES       |
| P     | A | C | V | TH011           | <chem>Clc1ccc(cc1)/N=C\1\NC(=O)/C(=C/C=C/c2ccc(cc2)[N+](=O)[O-])/S1</chem>  | 298   | 16.08                       | 15.6402 | 15.6492 | 15.6744 | 15.6443     | 59.17881  | 60.10867 | 49.07437  | 51.19199             | YES | YES | YES | YES       |
| A     | P | V | C | TH012           | <chem>Cc1ccc(cc1)/N=C\1\NC(=O)/C(=C/C=C/c2ccc(cc2)[N+](=O)[O-])/S1</chem>   | 298   | 13.8                        | 14.1763 | 14.2548 | 14.4354 | 14.2629     | 55.50863  | 55.57215 | 45.86855  | 47.5624              | YES | YES | YES | YES       |
| V     | C | A | P | TH013           | <chem>COc1ccc(cc1)/N=C/1\S/C(=C\C=C\c2ccc(cc2)[N+](=O)[O-])/C(=O)N1~</chem> | 298   | 16.49                       | 15.9219 | 16.1861 | 16.318  | 16.2729     | 59.88507  | 61.85557 | 50.73957  | 52.84372             | YES | YES | YES | YES       |
| V     | C | A | P | TH014           | <chem>CN(c1ccc(cc1)/C=C/C=C/1\S/C(=N\c2ccccc2)/NC1=O)C</chem>               | 298   | 15.67                       | 15.5278 | 15.7114 | 15.8076 | 15.8269     | 58.89707  | 60.31129 | 49.41896  | 51.67187             | YES | YES | YES | YES       |
| C     | V | P | A | TH015           | <chem>Clc1ccc(cc1)/N=C\1\NC(=O)/C(=C/C=C/c2ccc(cc2)N(C)C)/S1</chem>         | 298   | 16.08                       | 15.3615 | 15.5177 | 15.4739 | 15.5194     | 58.48018  | 59.6811  | 48.55551  | 50.86406             | YES | YES | YES | YES       |
| P     | A | C | V | TH016           | <chem>Cc1ccc(cc1)/N=C\1\NC(=O)/C(=C/C=C/c2ccc(cc2)N(C)C)/S1</chem>          | 298   | 13.93                       | 14.2808 | 14.2816 | 14.3407 | 14.3526     | 55.77074  | 55.65919 | 45.6234   | 47.79805             | YES | YES | YES | YES       |
| V     | C | A | P | TH017           | <chem>COc1ccc(cc1)/N=C/1\S/C(=C\C=C\c2ccc(cc2)N(C)C)/C(=O)N1</chem>         | 298   | 14.17                       | 14.3042 | 14.3844 | 14.3456 | 14.2432     | 55.82941  | 55.9939  | 45.63599  | 47.51076             | YES | YES | YES | YES       |
| V     | C | A | P | TH018           | <chem>COc1ccc(cc1)/N=C/1\SCC(=O)N1</chem>                                   | 318   | 15.17                       | 14.9376 | 15.2315 | 15.3298 | 15.3124     | 57.41739  | 58.74968 | 48.18278  | 50.32014             | YES | YES | YES | NO        |
| C     | V | P | A | TH019           | <chem>O=C1N/C(=N/c2ccccc2)/S/C/1=C\C=C\Cc1ccccc1</chem>                     | 318   | 16.41                       | 16.2444 | 16.3898 | 16.4021 | 16.4217     | 60.69345  | 62.51839 | 50.95715  | 53.23465             | YES | YES | YES | YES       |
| A     | P | V | C | TH020           | <chem>Clc1ccc(cc1)/N=C\1\NC(=O)/C(=C/C=C/c2ccccc2)/S1</chem>                | 318   | 14.94                       | 14.9124 | 14.9749 | 15.172  | 15.0934     | 57.35412  | 57.915   | 47.77453  | 49.74465             | YES | YES | YES | YES       |
| C     | V | P | A | TH021           | <chem>Cc1ccc(cc1)/N=C\1\NC(=O)/C(=C/C=C/c2ccccc2)/S1</chem>                 | 318   | 15.39                       | 14.9977 | 15.0174 | 15.3069 | 15.3537     | 57.56797  | 58.05336 | 48.12337  | 50.42853             | YES | YES | YES | YES       |
| V     | C | A | P | TH022           | <chem>COc1ccc(cc1)/N=C\1\NC(=O)/C(=C/C=C/c2ccccc2)/S1</chem>                | 318   | 16.41                       | 16.0576 | 16.2531 | 16.3924 | 16.3797     | 60.22527  | 62.07372 | 50.93228  | 53.12434             | YES | YES | YES | YES       |
| V     | C | A | P | TH023           | <chem>COc1ccc(cc1)/C=C/C=C/1\S/C(=N\c2ccccc2)/NC1=O</chem>                  | 318   | 16.11                       | 16.0345 | 16.1943 | 16.2441 | 16.2204     | 60.16732  | 61.88241 | 50.54852  | 52.70583             | YES | YES | YES | YES       |
| C     | V | P | A | TH024           | <chem>COc1ccc(cc1)/C=C/C=C/1\S/C(=N\c2ccc(cc2)Cl)/NC1=O</chem>              | 318   | 15.34                       | 15.2104 | 15.2976 | 15.3754 | 15.3552     | 58.10132  | 58.96493 | 48.3006   | 50.43244             | YES | YES | YES | YES       |
| V     | C | A | P | TH025           | <chem>COc1ccc(cc1)/C=C/C=C/1\S/C(=N\c2ccc(cc2)C)/NC1=O</chem>               | 318   | 15.34                       | 15.0834 | 15.1361 | 15.3659 | 15.3295     | 57.7829   | 58.43932 | 48.27621  | 50.36504             | YES | YES | YES | YES       |
| A     | P | V | C | TH026           | <chem>COc1ccc(cc1)/C=C/C=C/1\S/C(=N\c2ccc(cc2)OC)/NC1=O</chem>              | 318   | 14.73                       | 14.9682 | 15.0166 | 15.1531 | 15.0059     | 57.49407  | 58.05051 | 47.72563  | 49.51467             | YES | YES | YES | YES       |
| C     | V | P | A | TH027           | <chem>O=C1N/C(=N/c2ccccc2)/S/C/1=C\C=C\Cc1ccc(cc1)[N+](=O)[O-]</chem>       | 318   | 16.25                       | 16.1323 | 16.3151 | 16.0153 | 16.0778     | 60.41257  | 62.2753  | 49.95652  | 52.33113             | YES | YES | YES | YES       |
| V     | C | A | P | TH028           | <chem>Clc1ccc(cc1)/N=C\1\NC(=O)/C(=C/C=C/c2ccc(cc2)[N+](=O)[O-])/S1~</chem> | 318   | 16.25                       | 16.0944 | 16.0907 | 16.0874 | 16.0352     | 60.31735  | 61.54525 | 50.14311  | 52.21922             | YES | YES | YES | YES       |
| A     | P | V | C | TH029           | <chem>Cc1ccc(cc1)/N=C\1\NC(=O)/C(=C/C=C/c2ccc(cc2)[N+](=O)[O-])/S1</chem>   | 318   | 14.42                       | 14.6304 | 14.6964 | 14.8485 | 14.6538     | 56.64718  | 57.00874 | 46.93729  | 48.58963             | YES | YES | YES | YES       |
| V     | C | A | P | TH030           | <chem>COc1ccc(cc1)/N=C/1\S/C(=C\C=C\c2ccc(cc2)[N+](=O)[O-])/C(=O)N1~</chem> | 318   | 16.76                       | 16.3761 | 16.6276 | 16.731  | 16.6638     | 61.02361  | 63.29215 | 51.80831  | 53.87095             | YES | YES | YES | YES       |
| A     | P | V | C | TH031           | <chem>CN(c1ccc(cc1)/C=C/C=C/1\S/C(=N\c2ccccc2)/NC1=O)C</chem>               | 318   | 16.11                       | 15.982  | 16.153  | 16.2206 | 16.2178     | 60.03561  | 61.74787 | 50.4877   | 52.6991              | YES | YES | YES | YES       |
| P     | A | C | V | TH032           | <chem>Clc1ccc(cc1)/N=C\1\NC(=O)/C(=C/C=C/c2ccc(cc2)N(C)C)/S1</chem>         | 318   | 16.18                       | 15.8157 | 15.9593 | 15.8869 | 15.9104     | 59.61873  | 61.11769 | 49.62425  | 51.89129             | YES | YES | YES | YES       |
| C     | V | P | A | TH033           | <chem>Cc1ccc(cc1)/N=C\1\NC(=O)/C(=C/C=C/c2ccc(cc2)N(C)C)/S1</chem>          | 318   | 14.52                       | 14.7349 | 14.7231 | 14.7537 | 14.7435     | 56.90929  | 57.09578 | 46.69214  | 48.82528             | YES | YES | YES | YES       |
| P     | A | C | V | TH034           | <chem>COc1ccc(cc1)/N=C/1\S/C(=C\C=C\c2ccc(cc2)N(C)C)/C(=O)N1</chem>         | 318   | 14.73                       | 14.7583 | 14.826  | 14.7586 | 14.6342     | 56.96795  | 57.43049 | 46.70473  | 48.53799             | YES | YES | YES | YES       |
| P     | A | C | V | TH035           | <chem>COc1ccc(cc1)/N=C/1\SCC(=O)N1</chem>                                   | 328   | 15.36                       | 15.2979 | 15.5432 | 15.3953 | 15.4459     | 58.32057  | 59.76404 | 48.3521   | 50.67072             | YES | YES | YES | NO        |
| A     | P | V | C | TH036           | <chem>O=C1N/C(=N/c2ccccc2)/S/C/1=C\C=C\Cc1ccccc1</chem>                     | 328   | 16.64                       | 16.6046 | 16.7016 | 16.4675 | 16.5551     | 61.59663  | 63.53275 | 51.12647  | 53.58523             | YES | YES | YES | YES       |
| A     | P | V | C | TH037           | <chem>Clc1ccc(cc1)/N=C\1\NC(=O)/C(=C/C=C/c2ccccc2)/S1</chem>                | 328   | 15.17                       | 15.2726 | 15.2867 | 15.2375 | 15.2268     | 58.2573   | 58.92935 | 47.94385  | 50.09523             | YES | YES | YES | YES       |

|   |   |   |   |       |                                                                |     |       |         |         |         |         |          |          |          |          |     |     |     |     |
|---|---|---|---|-------|----------------------------------------------------------------|-----|-------|---------|---------|---------|---------|----------|----------|----------|----------|-----|-----|-----|-----|
| P | A | C | V | TH038 | Cc1ccc(cc1)/N=C\1/NC(=O)/C(=C/C=C/c2ccccc2)/S1                 | 328 | 15.54 | 15.3579 | 15.3292 | 15.3723 | 15.4871 | 58.47115 | 59.06771 | 48.29269 | 50.77911 | YES | YES | YES | YES |
| P | A | C | V | TH039 | COc1ccc(cc1)/N=C\1/NC(=O)/C(=C/C=C/c2ccccc2)/S1                | 328 | 16.64 | 16.4179 | 16.5649 | 16.4579 | 16.5131 | 61.12845 | 63.08808 | 51.1016  | 53.47492 | YES | YES | YES | YES |
| V | C | A | P | TH040 | COc1ccc(cc1)/C=C/C=C/1\S/C(=N\c2ccccc2)/NC1=O                  | 328 | 16.33 | 16.3948 | 16.5061 | 16.3096 | 16.3538 | 61.0705  | 62.89676 | 50.71784 | 53.05641 | YES | YES | YES | YES |
| C | V | P | A | TH041 | COc1ccc(cc1)/C=C/C=C/1\S/C(=N\c2ccc(cc2)Cl)/NC1=O              | 328 | 15.52 | 15.5707 | 15.6094 | 15.4408 | 15.4886 | 59.0045  | 59.97928 | 48.46993 | 50.78303 | YES | YES | YES | YES |
| V | C | A | P | TH042 | COc1ccc(cc1)/C=C/C=C/1\S/C(=N\c2ccc(cc2)C)/NC1=O               | 328 | 15.52 | 15.4437 | 15.4478 | 15.4314 | 15.463  | 58.68608 | 59.45368 | 48.44553 | 50.71562 | YES | YES | YES | YES |
| A | P | V | C | TH044 | O=C1N/C(=N/c2ccccc2)/S/C/1=C\C=C\c1ccc(cc1)[N+](=O)[O-]        | 328 | 16.42 | 16.4926 | 16.6269 | 16.0808 | 16.2112 | 61.31576 | 63.28965 | 50.12584 | 52.68171 | YES | YES | YES | YES |
| P | A | C | V | TH045 | Clc1ccc(cc1)/N=C\1/NC(=O)/C(=C/C=C/c2ccc(cc2)[N+](=O)[O-])/S1  | 328 | 16.42 | 16.4546 | 16.4025 | 16.1529 | 16.1686 | 61.22053 | 62.55961 | 50.31243 | 52.5698  | YES | YES | YES | YES |
| C | V | P | A | TH046 | Cc1ccc(cc1)/N=C\1/NC(=O)/C(=C/C=C/c2ccc(cc2)[N+](=O)[O-])/S1   | 328 | 14.73 | 14.9907 | 15.0081 | 14.9139 | 14.7873 | 57.55036 | 58.0231  | 47.10661 | 48.94021 | YES | YES | YES | YES |
| A | P | V | C | TH047 | COc1ccc(cc1)/N=C/1\S/C(=C\C=C\c2ccc(cc2)[N+](=O)[O-])/C(=O)N1~ | 328 | 16.86 | 16.7363 | 16.9394 | 16.7964 | 16.7973 | 61.9268  | 64.30651 | 51.97763 | 54.22153 | YES | YES | YES | YES |
| A | P | V | C | TH048 | CN(c1ccc(cc1)/C=C/C=C/1\S/C(=N\c2ccccc2)/NC1=O)C               | 328 | 16.33 | 16.3422 | 16.4647 | 16.2861 | 16.3513 | 60.93879 | 62.76223 | 50.65702 | 53.04968 | YES | YES | YES | YES |
| A | P | V | C | TH049 | Clc1ccc(cc1)/N=C\1/NC(=O)/C(=C/C=C/c2ccc(cc2)N(C)C)/S1         | 328 | 16.19 | 16.176  | 16.2711 | 15.9524 | 16.0438 | 60.52191 | 62.13205 | 49.79358 | 52.24187 | YES | YES | YES | YES |
| V | C | A | P | TH050 | Cc1ccc(cc1)/N=C\1/NC(=O)/C(=C/C=C/c2ccc(cc2)N(C)C)/S1          | 328 | 14.81 | 15.0952 | 15.0349 | 14.8192 | 14.8769 | 57.81247 | 58.11014 | 46.86146 | 49.17586 | YES | YES | YES | YES |
| P | A | C | V | TH051 | COc1ccc(cc1)/N=C/1\S/C(=C\C=C\c2ccc(cc2)N(C)C)/C(=O)N1         | 328 | 14.96 | 15.1186 | 15.1378 | 14.824  | 14.7676 | 57.87113 | 58.44484 | 46.87406 | 48.88857 | YES | YES | YES | YES |
| C | V | P | A | TH052 | COc1ccc(cc1)/N=C/1\SCC(=O)N1                                   | 338 | 15.56 | 15.3898 | 15.6698 | 15.665  | 15.6542 | 58.55091 | 60.17571 | 49.04997 | 51.21821 | YES | YES | YES | NO  |
| C | V | P | A | TH053 | O=C1N/C(=N/c2ccccc2)/S/C/1=C\C=C\c1ccccc1                      | 338 | 16.71 | 16.6965 | 16.8281 | 16.7372 | 16.7635 | 61.82697 | 63.94442 | 51.82434 | 54.13272 | YES | YES | YES | YES |
| P | A | C | V | TH054 | Clc1ccc(cc1)/N=C\1/NC(=O)/C(=C/C=C/c2ccccc2)/S1                | 338 | 15.43 | 15.3645 | 15.4132 | 15.5072 | 15.4352 | 58.48764 | 59.34102 | 48.64172 | 50.64272 | YES | YES | YES | YES |
| C | V | P | A | TH055 | Cc1ccc(cc1)/N=C\1/NC(=O)/C(=C/C=C/c2ccccc2)/S1                 | 338 | 15.7  | 15.4498 | 15.4557 | 15.642  | 15.6955 | 58.70149 | 59.47938 | 48.99056 | 51.3266  | YES | YES | YES | YES |
| V | C | A | P | TH056 | COc1ccc(cc1)/N=C\1/NC(=O)/C(=C/C=C/c2ccccc2)/S1                | 338 | 16.71 | 16.5098 | 16.6914 | 16.7276 | 16.7215 | 61.35879 | 63.49975 | 51.79947 | 54.02241 | YES | YES | YES | YES |
| A | P | V | C | TH057 | COc1ccc(cc1)/C=C/C=C/1\S/C(=N\c2ccccc2)/NC1=O                  | 338 | 16.53 | 16.4866 | 16.6326 | 16.5793 | 16.5622 | 61.30083 | 63.30843 | 51.41571 | 53.6039  | YES | YES | YES | YES |
| A | P | V | C | TH058 | COc1ccc(cc1)/C=C/C=C/1\S/C(=N\c2ccc(cc2)Cl)/NC1=O              | 338 | 15.69 | 15.6626 | 15.7359 | 15.7105 | 15.697  | 59.23484 | 60.39095 | 49.1678  | 51.33051 | YES | YES | YES | YES |
| P | A | C | V | TH059 | COc1ccc(cc1)/C=C/C=C/1\S/C(=N\c2ccc(cc2)C)/NC1=O               | 338 | 15.69 | 15.5356 | 15.5744 | 15.7011 | 15.6713 | 58.91642 | 59.86535 | 49.1434  | 51.2631  | YES | YES | YES | YES |
| A | P | V | C | TH060 | COc1ccc(cc1)/C=C/C=C/1\S/C(=N\c2ccc(cc2)OC)/NC1=O              | 338 | 15.42 | 15.4203 | 15.4549 | 15.4883 | 15.3477 | 58.62759 | 59.47654 | 48.59282 | 50.41274 | YES | YES | YES | YES |
| C | V | P | A | TH061 | O=C1N/C(=N/c2ccccc2)/S/C/1=C\C=C\c1ccc(cc1)[N+](=O)[O-]        | 338 | 16.5  | 16.5845 | 16.7534 | 16.3505 | 16.4196 | 61.54609 | 63.70132 | 50.82371 | 53.2292  | YES | YES | YES | YES |
| V | C | A | P | TH062 | Clc1ccc(cc1)/N=C\1/NC(=O)/C(=C/C=C/c2ccc(cc2)[N+](=O)[O-])/S1~ | 338 | 16.5  | 16.5465 | 16.529  | 16.4226 | 16.377  | 61.45087 | 62.97128 | 51.0103  | 53.11729 | YES | YES | YES | YES |
| A | P | V | C | TH063 | Cc1ccc(cc1)/N=C\1/NC(=O)/C(=C/C=C/c2ccc(cc2)[N+](=O)[O-])/S1   | 338 | 15.05 | 15.0825 | 15.1347 | 15.1836 | 14.9956 | 57.7807  | 58.43477 | 47.80448 | 49.4877  | YES | YES | YES | YES |
| P | A | C | V | TH064 | COc1ccc(cc1)/N=C/1\S/C(=C\C=C\c2ccc(cc2)[N+](=O)[O-])/C(=O)N1  | 338 | 17.05 | 16.8282 | 17.0659 | 17.0662 | 17.0056 | 62.15713 | 64.71818 | 52.6755  | 54.76902 | YES | YES | YES | YES |
| P | A | C | V | TH065 | CN(c1ccc(cc1)/C=C/C=C/1\S/C(=N\c2ccccc2)/NC1=O)C               | 338 | 16.53 | 16.4341 | 16.5913 | 16.5558 | 16.5596 | 61.16913 | 63.1739  | 51.35489 | 53.59716 | YES | YES | YES | YES |
| C | V | P | A | TH066 | Clc1ccc(cc1)/N=C\1/NC(=O)/C(=C/C=C/c2ccc(cc2)N(C)C)/S1         | 338 | 16.31 | 16.2678 | 16.3976 | 16.2221 | 16.2522 | 60.75225 | 62.54372 | 50.49145 | 52.78936 | YES | YES | YES | YES |
| P | A | C | V | TH067 | Cc1ccc(cc1)/N=C\1/NC(=O)/C(=C/C=C/c2ccc(cc2)N(C)C)/S1          | 338 | 15.11 | 15.1871 | 15.1614 | 15.0889 | 15.0853 | 58.04281 | 58.52181 | 47.55933 | 49.72335 | YES | YES | YES | YES |
| P | A | C | V | TH068 | COc1ccc(cc1)/N=C/1\S/C(=C\C=C\c2ccc(cc2)N(C)C)/C(=O)N1         | 338 | 15.23 | 15.2105 | 15.2643 | 15.0937 | 14.976  | 58.10147 | 58.85651 | 47.57193 | 49.43606 | YES | YES | YES | YES |
| V | C | A | P | TH069 | COc1ccc(cc1)/N=C/1\SCC(=O)N1                                   | 348 | 15.7  | 15.4989 | 15.7803 | 15.7911 | 15.8155 | 58.82465 | 60.53529 | 49.37633 | 51.64204 | YES | YES | YES | NO  |
| A | P | V | C | TH070 | O=C1N/C(=N/c2ccccc2)/S/C/1=C\C=C\c1ccccc1                      | 348 | 16.81 | 16.8057 | 16.9386 | 16.8633 | 16.9248 | 62.10071 | 64.304   | 52.1507  | 54.55655 | YES | YES | YES | YES |
| V | C | A | P | TH071 | Clc1ccc(cc1)/N=C\1/NC(=O)/C(=C/C=C/c2ccccc2)/S1                | 348 | 15.58 | 15.4737 | 15.5237 | 15.6333 | 15.5965 | 58.76138 | 59.7006  | 48.96808 | 51.06655 | YES | YES | YES | YES |
| C | V | P | A | TH072 | Cc1ccc(cc1)/N=C\1/NC(=O)/C(=C/C=C/c2ccccc2)/S1                 | 348 | 15.87 | 15.559  | 15.5663 | 15.7681 | 15.8568 | 58.97523 | 59.83896 | 49.31692 | 51.75043 | YES | YES | YES | YES |
| P | A | C | V | TH073 | COc1ccc(cc1)/N=C\1/NC(=O)/C(=C/C=C/c2ccccc2)/S1                | 348 | 16.81 | 16.619  | 16.8019 | 16.8537 | 16.8828 | 61.63254 | 63.85933 | 52.12583 | 54.44624 | YES | YES | YES | YES |
| A | P | V | C | TH074 | COc1ccc(cc1)/C=C/C=C/1\S/C(=N\c2ccccc2)/NC1=O                  | 348 | 16.72 | 16.5958 | 16.7431 | 16.7054 | 16.7235 | 61.57458 | 63.66801 | 51.74206 | 54.02773 | YES | YES | YES | YES |
| A | P | V | C | TH075 | COc1ccc(cc1)/C=C/C=C/1\S/C(=N\c2ccc(cc2)Cl)/NC1=O              | 348 | 15.9  | 15.7718 | 15.8464 | 15.8366 | 15.8583 | 59.50858 | 60.75053 | 49.49415 | 51.75434 | YES | YES | YES | YES |
| V | C | A | P | TH076 | COc1ccc(cc1)/C=C/C=C/1\S/C(=N\c2ccc(cc2)C)/NC1=O               | 348 | 15.87 | 15.6447 | 15.6849 | 15.8272 | 15.8326 | 59.19016 | 60.22493 | 49.46976 | 51.68693 | YES | YES | YES | YES |
| A | P | V | C | TH078 | O=C1N/C(=N/c2ccccc2)/S/C/1=C\C=C\c1ccc(cc1)[N+](=O)[O-]        | 348 | 16.49 | 16.6937 | 16.8639 | 16.4766 | 16.5809 | 61.81984 | 64.0609  | 51.15007 | 53.65303 | YES | YES | YES | YES |
| P | A | C | V | TH079 | Clc1ccc(cc1)/N=C\1/NC(=O)/C(=C/C=C/c2ccc(cc2)[N+](=O)[O-])/S1  | 348 | 16.49 | 16.6557 | 16.6395 | 16.5487 | 16.5383 | 61.72461 | 63.33086 | 51.33666 | 53.54112 | YES | YES | YES | YES |
| A | P | V | C | TH080 | Cc1ccc(cc1)/N=C\1/NC(=O)/C(=C/C=C/c2ccc(cc2)[N+](=O)[O-])/S1   | 348 | 15.35 | 15.1917 | 15.2452 | 15.3097 | 15.1569 | 58.05444 | 58.79435 | 48.13083 | 49.91153 | YES | YES | YES | YES |



|   |   |   |   |       |                                                                |     |       |         |         |         |         |          |          |          |          |     |     |     |     |
|---|---|---|---|-------|----------------------------------------------------------------|-----|-------|---------|---------|---------|---------|----------|----------|----------|----------|-----|-----|-----|-----|
| C | V | P | A | TH081 | COc1ccc(cc1)/N=C/I\S/C(=C\C=C\c2ccc(cc2)[N+](=O)[O-])/C(=O)N1~ | 348 | 17.11 | 16.9374 | 17.1764 | 17.1923 | 17.1669 | 62.43088 | 65.07776 | 53.00186 | 55.19285 | YES | YES | YES | YES |
| P | A | C | V | TH082 | CN(c1ccc(cc1)/C=C/C=C/I\S/C(=N\c2ccc(cc2)/NC1=O)C              | 348 | 16.72 | 16.5433 | 16.7018 | 16.6819 | 16.7209 | 61.44288 | 63.53348 | 51.68124 | 54.02099 | YES | YES | YES | YES |
| P | A | C | V | TH083 | Clc1ccc(cc1)/N=C/I\NC(=O)/C(=C/C=C/c2ccc(cc2)N(C)C)/S1         | 348 | 16.33 | 16.377  | 16.5081 | 16.3482 | 16.4135 | 61.02599 | 62.9033  | 50.8178  | 53.21319 | YES | YES | YES | YES |
| V | C | A | P | TH084 | Cc1ccc(cc1)/N=C/I\NC(=O)/C(=C/C=C/c2ccc(cc2)N(C)C)/S1          | 348 | 15.39 | 15.2963 | 15.2719 | 15.215  | 15.2466 | 58.31655 | 58.88139 | 47.88569 | 50.14718 | YES | YES | YES | YES |
| A | P | V | C | TH085 | COc1ccc(cc1)/N=C/I\S/C(=C\C=C\c2ccc(cc2)N(C)C)/C(=O)N1         | 348 | 15.52 | 15.3197 | 15.3748 | 15.2199 | 15.1373 | 58.37522 | 59.21609 | 47.89828 | 49.85989 | YES | YES | YES | YES |
| C | V | P | A | TH086 | COc1ccc(cc1)/N=C/I\SCC(=O)N1                                   | 358 | 15.93 | 15.8354 | 16.1544 | 15.9217 | 15.9079 | 59.66823 | 61.75248 | 49.71421 | 51.88483 | YES | YES | YES | NO  |
| V | C | A | P | TH087 | O=C1N/C(=N/c2ccccc2)/S/C/I=C\C=C\Cc1ccccc1                     | 358 | 16.98 | 17.1422 | 17.3127 | 16.9939 | 17.0172 | 62.94429 | 65.52119 | 52.48858 | 54.79934 | YES | YES | YES | YES |
| A | P | V | C | TH088 | Clc1ccc(cc1)/N=C/I\NC(=O)/C(=C/C=C/c2ccc(cc2)/S1               | 358 | 15.75 | 15.8102 | 15.8978 | 15.7639 | 15.6889 | 59.60496 | 60.9178  | 49.30596 | 51.30933 | YES | YES | YES | YES |
| P | A | C | V | TH089 | Cc1ccc(cc1)/N=C/I\NC(=O)/C(=C/C=C/c2ccc(cc2)/S1                | 358 | 15.92 | 15.8955 | 15.9404 | 15.8987 | 15.9492 | 59.81881 | 61.05616 | 49.6548  | 51.99322 | YES | YES | YES | YES |
| A | P | V | C | TH090 | COc1ccc(cc1)/N=C/I\NC(=O)/C(=C/C=C/c2ccccc2)/S1                | 358 | 16.98 | 16.9554 | 17.1761 | 16.9843 | 16.9752 | 62.47611 | 65.07652 | 52.46371 | 54.68903 | YES | YES | YES | YES |
| P | A | C | V | TH091 | COc1ccc(cc1)/C=C/C=C/I\S/C(=N\c2ccccc2)/NC1=O                  | 358 | 16.94 | 16.9323 | 17.1173 | 16.836  | 16.8159 | 62.41816 | 64.88521 | 52.07995 | 54.27052 | YES | YES | YES | YES |
| V | C | A | P | TH092 | COc1ccc(cc1)/C=C/C=C/I\S/C(=N\c2ccc(cc2)Cl)/NC1=O              | 358 | 16.07 | 16.1082 | 16.2205 | 15.9672 | 15.9507 | 60.35216 | 61.96773 | 49.83203 | 51.99713 | YES | YES | YES | YES |
| A | P | V | C | TH093 | COc1ccc(cc1)/C=C/C=C/I\S/C(=N\c2ccc(cc2)C)/NC1=O               | 358 | 16.07 | 15.9812 | 16.059  | 15.9578 | 15.925  | 60.03374 | 61.44212 | 49.80764 | 51.92972 | YES | YES | YES | YES |
| P | A | C | V | TH094 | COc1ccc(cc1)/C=C/C=C/I\S/C(=N\c2ccc(cc2)OC)/NC1=O              | 358 | 16.07 | 15.866  | 15.9395 | 15.745  | 15.6014 | 59.74491 | 61.05331 | 49.25706 | 51.07936 | YES | YES | YES | YES |
| C | V | P | A | TH095 | O=C1N/C(=N/c2ccccc2)/S/C/I=C\C=C\Cc1ccccc1                     | 358 | 16.56 | 17.0302 | 17.238  | 16.6072 | 16.6733 | 62.66342 | 65.27809 | 51.48795 | 53.89582 | YES | YES | YES | YES |
| V | C | A | P | TH096 | Clc1ccc(cc1)/N=C/I\NC(=O)/C(=C/C=C/c2ccc(cc2)[N+](=O)[O-])/S1~ | 358 | 16.56 | 16.9922 | 17.0136 | 16.6793 | 16.6307 | 62.56819 | 64.54805 | 51.67454 | 53.78391 | YES | YES | YES | YES |
| A | P | V | C | TH097 | Cc1ccc(cc1)/N=C/I\NC(=O)/C(=C/C=C/c2ccc(cc2)[N+](=O)[O-])/S1   | 358 | 15.64 | 15.5282 | 15.6193 | 15.4403 | 15.2493 | 58.89802 | 60.01154 | 48.46872 | 50.15432 | YES | YES | YES | YES |
| V | C | A | P | TH098 | COc1ccc(cc1)/N=C/I\S/C(=C\C=C\c2ccc(cc2)[N+](=O)[O-])/C(=O)N1~ | 358 | 17.19 | 17.2739 | 17.5506 | 17.3229 | 17.2593 | 63.27446 | 66.29495 | 53.33974 | 55.43564 | YES | YES | YES | YES |
| C | V | P | A | TH099 | CN(c1ccc(cc1)/C=C/C=C/I\S/C(=N\c2ccc(cc2)/NC1=O)C              | 358 | 16.94 | 16.8798 | 17.0759 | 16.8125 | 16.8133 | 62.28645 | 64.75067 | 52.01913 | 54.26378 | YES | YES | YES | YES |
| C | V | P | A | TH100 | Clc1ccc(cc1)/N=C/I\NC(=O)/C(=C/C=C/c2ccc(cc2)N(C)C)/S1         | 358 | 16.33 | 16.7135 | 16.8822 | 16.4788 | 16.5059 | 61.86957 | 64.12049 | 51.15568 | 53.45598 | YES | YES | YES | YES |
| P | A | C | V | TH101 | Cc1ccc(cc1)/N=C/I\NC(=O)/C(=C/C=C/c2ccc(cc2)N(C)C)/S1          | 358 | 15.66 | 15.6328 | 15.6461 | 15.3456 | 15.339  | 59.16013 | 60.09858 | 48.22357 | 50.38997 | YES | YES | YES | YES |
| P | A | C | V | TH102 | COc1ccc(cc1)/N=C/I\S/C(=C\C=C\c2ccc(cc2)N(C)C)/C(=O)N1         | 358 | 15.79 | 15.6562 | 15.7489 | 15.3505 | 15.2297 | 59.21879 | 60.43329 | 48.23616 | 50.10268 | YES | YES | YES | YES |
| V | C | A | P | TH103 | COc1ccc(cc1)/N=C/I\SCC(=O)N1                                   | 378 | 16.34 | 15.2267 | 15.5963 | 15.7972 | 15.6882 | 58.14206 | 59.93673 | 49.39203 | 51.3074  | YES | YES | YES | NO  |
| A | P | V | C | TH104 | O=C1N/C(=N/c2ccccc2)/S/C/I=C\C=C\Cc1ccccc1                     | 378 | 17.28 | 17.5086 | 17.6517 | 17.3976 | 17.4184 | 63.8629  | 66.624   | 53.53313 | 55.85362 | YES | YES | YES | YES |
| C | V | P | A | TH105 | Clc1ccc(cc1)/N=C/I\NC(=O)/C(=C/C=C/c2ccc(cc2)/S1               | 378 | 16.18 | 16.1766 | 16.2368 | 16.1676 | 16.0902 | 60.52356 | 62.02061 | 50.35051 | 52.36361 | YES | YES | YES | YES |
| V | C | A | P | TH106 | Cc1ccc(cc1)/N=C/I\NC(=O)/C(=C/C=C/c2ccc(cc2)/S1                | 378 | 16.18 | 16.2619 | 16.2793 | 16.3024 | 16.3504 | 60.73741 | 62.15897 | 50.69935 | 53.0475  | YES | YES | YES | YES |
| P | A | C | V | TH107 | COc1ccc(cc1)/N=C/I\NC(=O)/C(=C/C=C/c2ccccc2)/S1                | 378 | 17.28 | 17.3219 | 17.515  | 17.388  | 17.3764 | 63.39472 | 66.17933 | 53.50826 | 55.74331 | YES | YES | YES | YES |
| C | V | P | A | TH108 | COc1ccc(cc1)/C=C/C=C/I\S/C(=N\c2ccccc2)/NC1=O                  | 378 | 17.33 | 17.2987 | 17.4562 | 17.2397 | 17.2172 | 63.33676 | 65.98802 | 53.1245  | 55.3248  | YES | YES | YES | YES |
| A | P | V | C | TH109 | COc1ccc(cc1)/C=C/C=C/I\S/C(=N\c2ccc(cc2)Cl)/NC1=O              | 378 | 16.4  | 16.4747 | 16.5595 | 16.3709 | 16.3519 | 61.27077 | 63.07054 | 50.87658 | 53.05141 | YES | YES | YES | YES |
| P | A | C | V | TH110 | COc1ccc(cc1)/C=C/C=C/I\S/C(=N\c2ccc(cc2)C)/NC1=O               | 378 | 16.4  | 16.3476 | 16.398  | 16.3615 | 16.3263 | 60.95234 | 62.54493 | 50.85219 | 52.984   | YES | YES | YES | YES |
| C | V | P | A | TH111 | COc1ccc(cc1)/C=C/C=C/I\S/C(=N\c2ccc(cc2)OC)/NC1=O              | 378 | 16.72 | 16.2324 | 16.2785 | 16.1487 | 16.0026 | 60.66352 | 62.15612 | 50.30161 | 52.13364 | YES | YES | YES | YES |
| C | V | P | A | TH112 | O=C1N/C(=N/c2ccccc2)/S/C/I=C\C=C\Cc1ccccc1                     | 378 | 16.81 | 17.3966 | 17.577  | 17.0109 | 17.0745 | 63.58202 | 66.38091 | 52.5325  | 54.9501  | YES | YES | YES | YES |
| V | C | A | P | TH113 | Clc1ccc(cc1)/N=C/I\NC(=O)/C(=C/C=C/c2ccc(cc2)[N+](=O)[O-])/S1~ | 378 | 16.81 | 17.3586 | 17.3526 | 17.083  | 17.032  | 63.4868  | 65.65086 | 52.71909 | 54.83819 | YES | YES | YES | YES |
| P | A | C | V | TH114 | Cc1ccc(cc1)/N=C/I\NC(=O)/C(=C/C=C/c2ccc(cc2)[N+](=O)[O-])/S1   | 378 | 16.24 | 15.8946 | 15.9583 | 15.844  | 15.6506 | 59.81662 | 61.11435 | 49.51327 | 51.2086  | YES | YES | YES | YES |
| A | P | V | C | TH115 | COc1ccc(cc1)/N=C/I\S/C(=C\C=C\c2ccc(cc2)[N+](=O)[O-])/C(=O)N1~ | 378 | 17.34 | 17.6403 | 17.8895 | 17.7266 | 17.6606 | 64.19306 | 67.39776 | 54.38429 | 56.48992 | YES | YES | YES | YES |
| V | C | A | P | TH116 | CN(c1ccc(cc1)/C=C/C=C/I\S/C(=N\c2ccc(cc2)/NC1=O)C              | 378 | 17.33 | 17.2462 | 17.4149 | 17.2162 | 17.2146 | 63.20506 | 65.85349 | 53.06368 | 55.31806 | YES | YES | YES | YES |
| C | V | P | A | TH117 | Clc1ccc(cc1)/N=C/I\NC(=O)/C(=C/C=C/c2ccc(cc2)N(C)C)/S1         | 378 | 16.43 | 17.0799 | 17.2212 | 16.8825 | 16.9071 | 62.78818 | 65.2233  | 52.20024 | 54.51026 | YES | YES | YES | YES |
| A | P | V | C | TH118 | Cc1ccc(cc1)/N=C/I\NC(=O)/C(=C/C=C/c2ccc(cc2)N(C)C)/S1          | 378 | 16.27 | 15.9992 | 15.985  | 15.7493 | 15.7403 | 60.07873 | 61.20139 | 49.26812 | 51.44425 | YES | YES | YES | YES |
| P | A | C | V | TH119 | COc1ccc(cc1)/N=C/I\S/C(=C\C=C\c2ccc(cc2)N(C)C)/C(=O)N1         | 378 | 16.29 | 16.0226 | 16.0879 | 15.7542 | 15.6309 | 60.1374  | 61.5361  | 49.28072 | 51.15695 | YES | YES | YES | YES |

A = Active training set, P = Passive training set, C = Calibration set, V = Validation set
